# Supplementary material
Source: ML conference proceedings conference paper supplement (https://proceedings.mlr.press/v119/li20i.html)
Supplement: Supplementary file [file li20i-supp.pdf]

In this pdf file, page 2-6 shows the examples of image attributes transformations using MSP (our model), Fader Networks and AttGAN (Just as the supplementary to the Figure 2 in the paper).

Page 7 shows the morphing progress of the individual attributes. That is the processes of changing black hair to blond hair, glasses to no glasses, and female to male. We generate such images by manually assign the individual attribute values to **make attribute values transition from -2 to 2 evenly.**



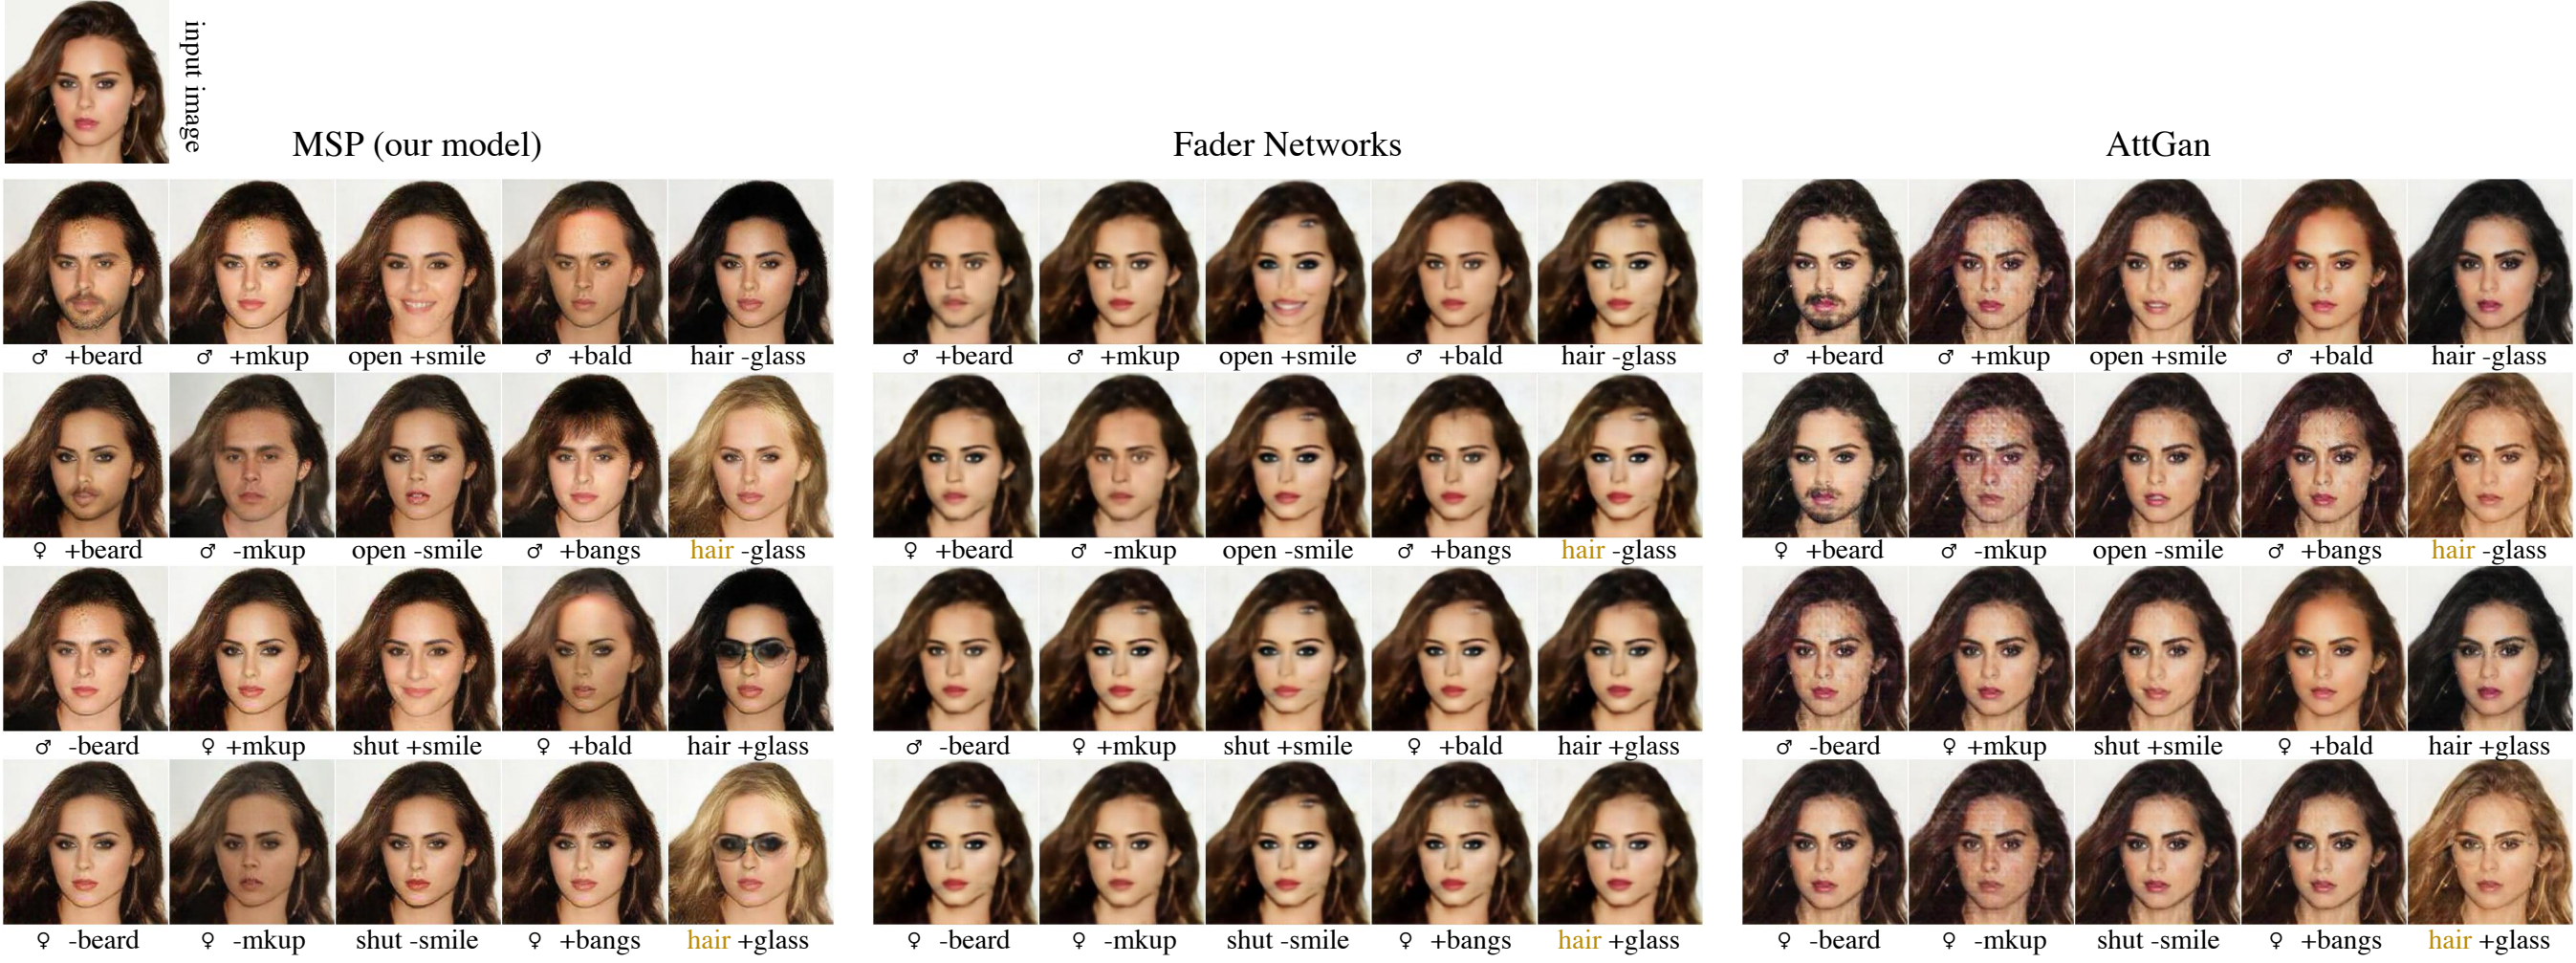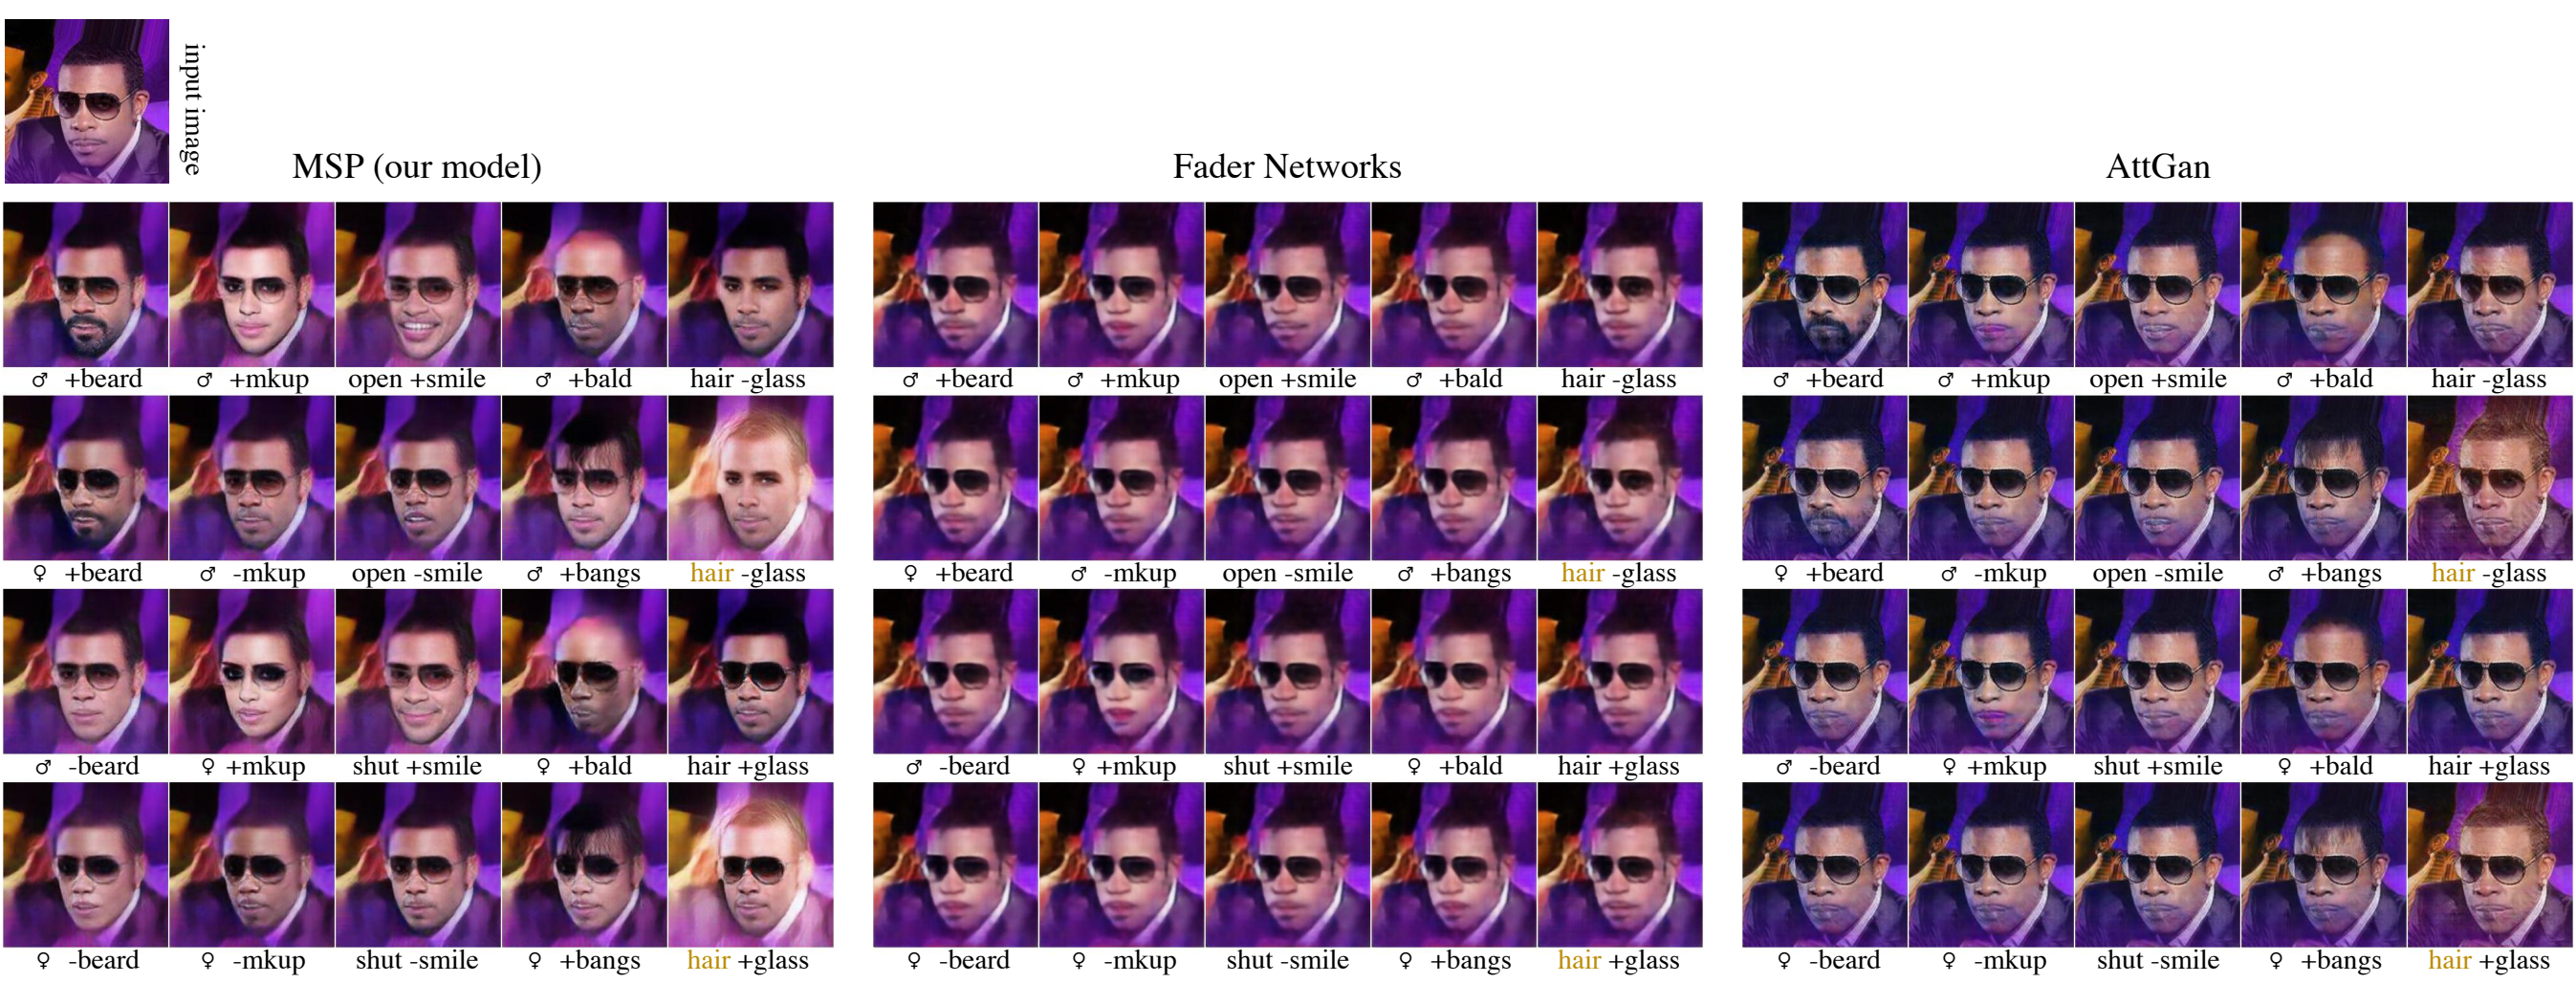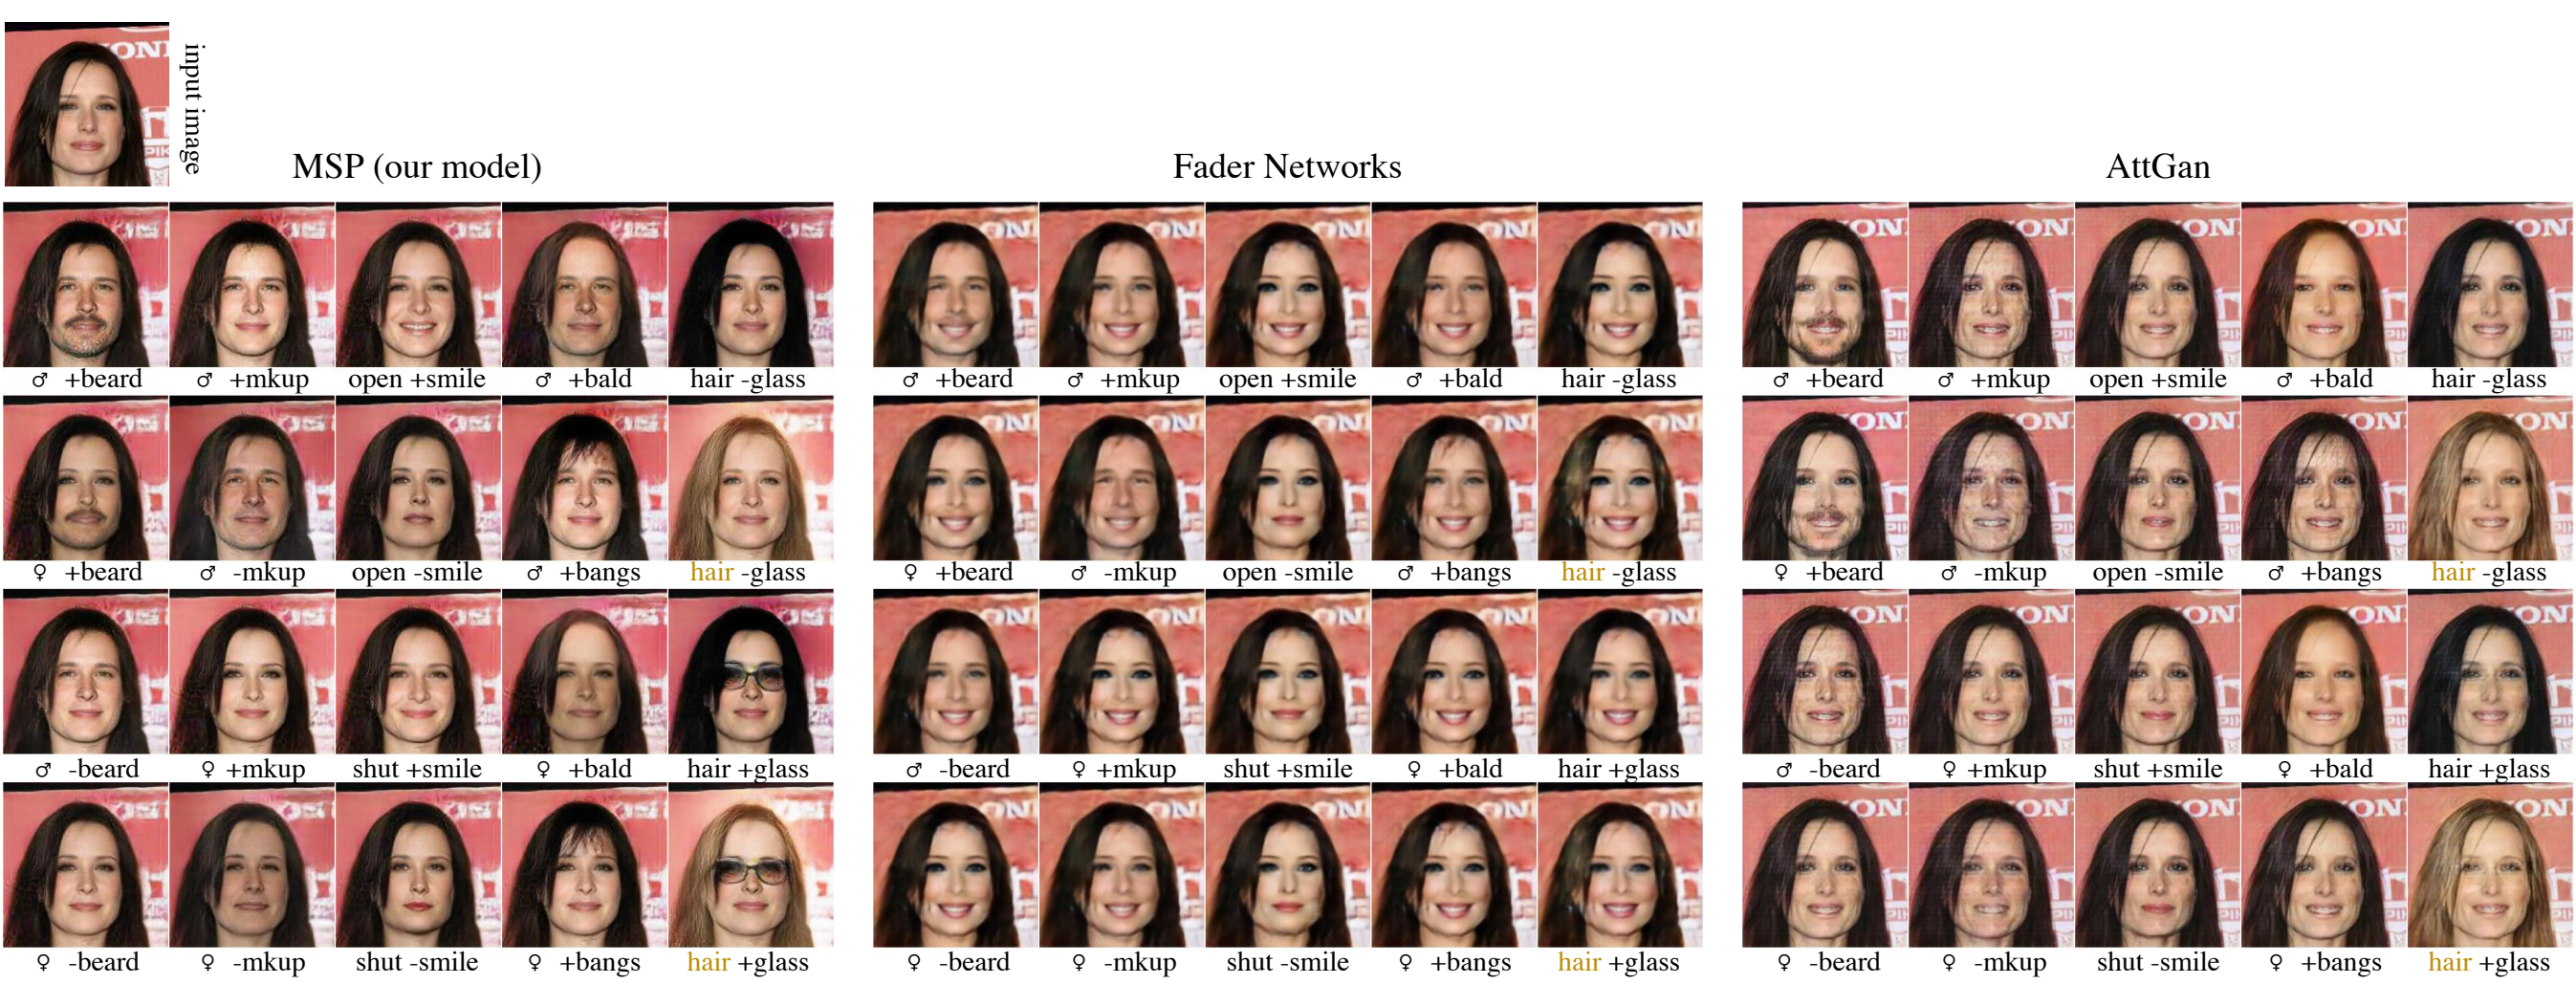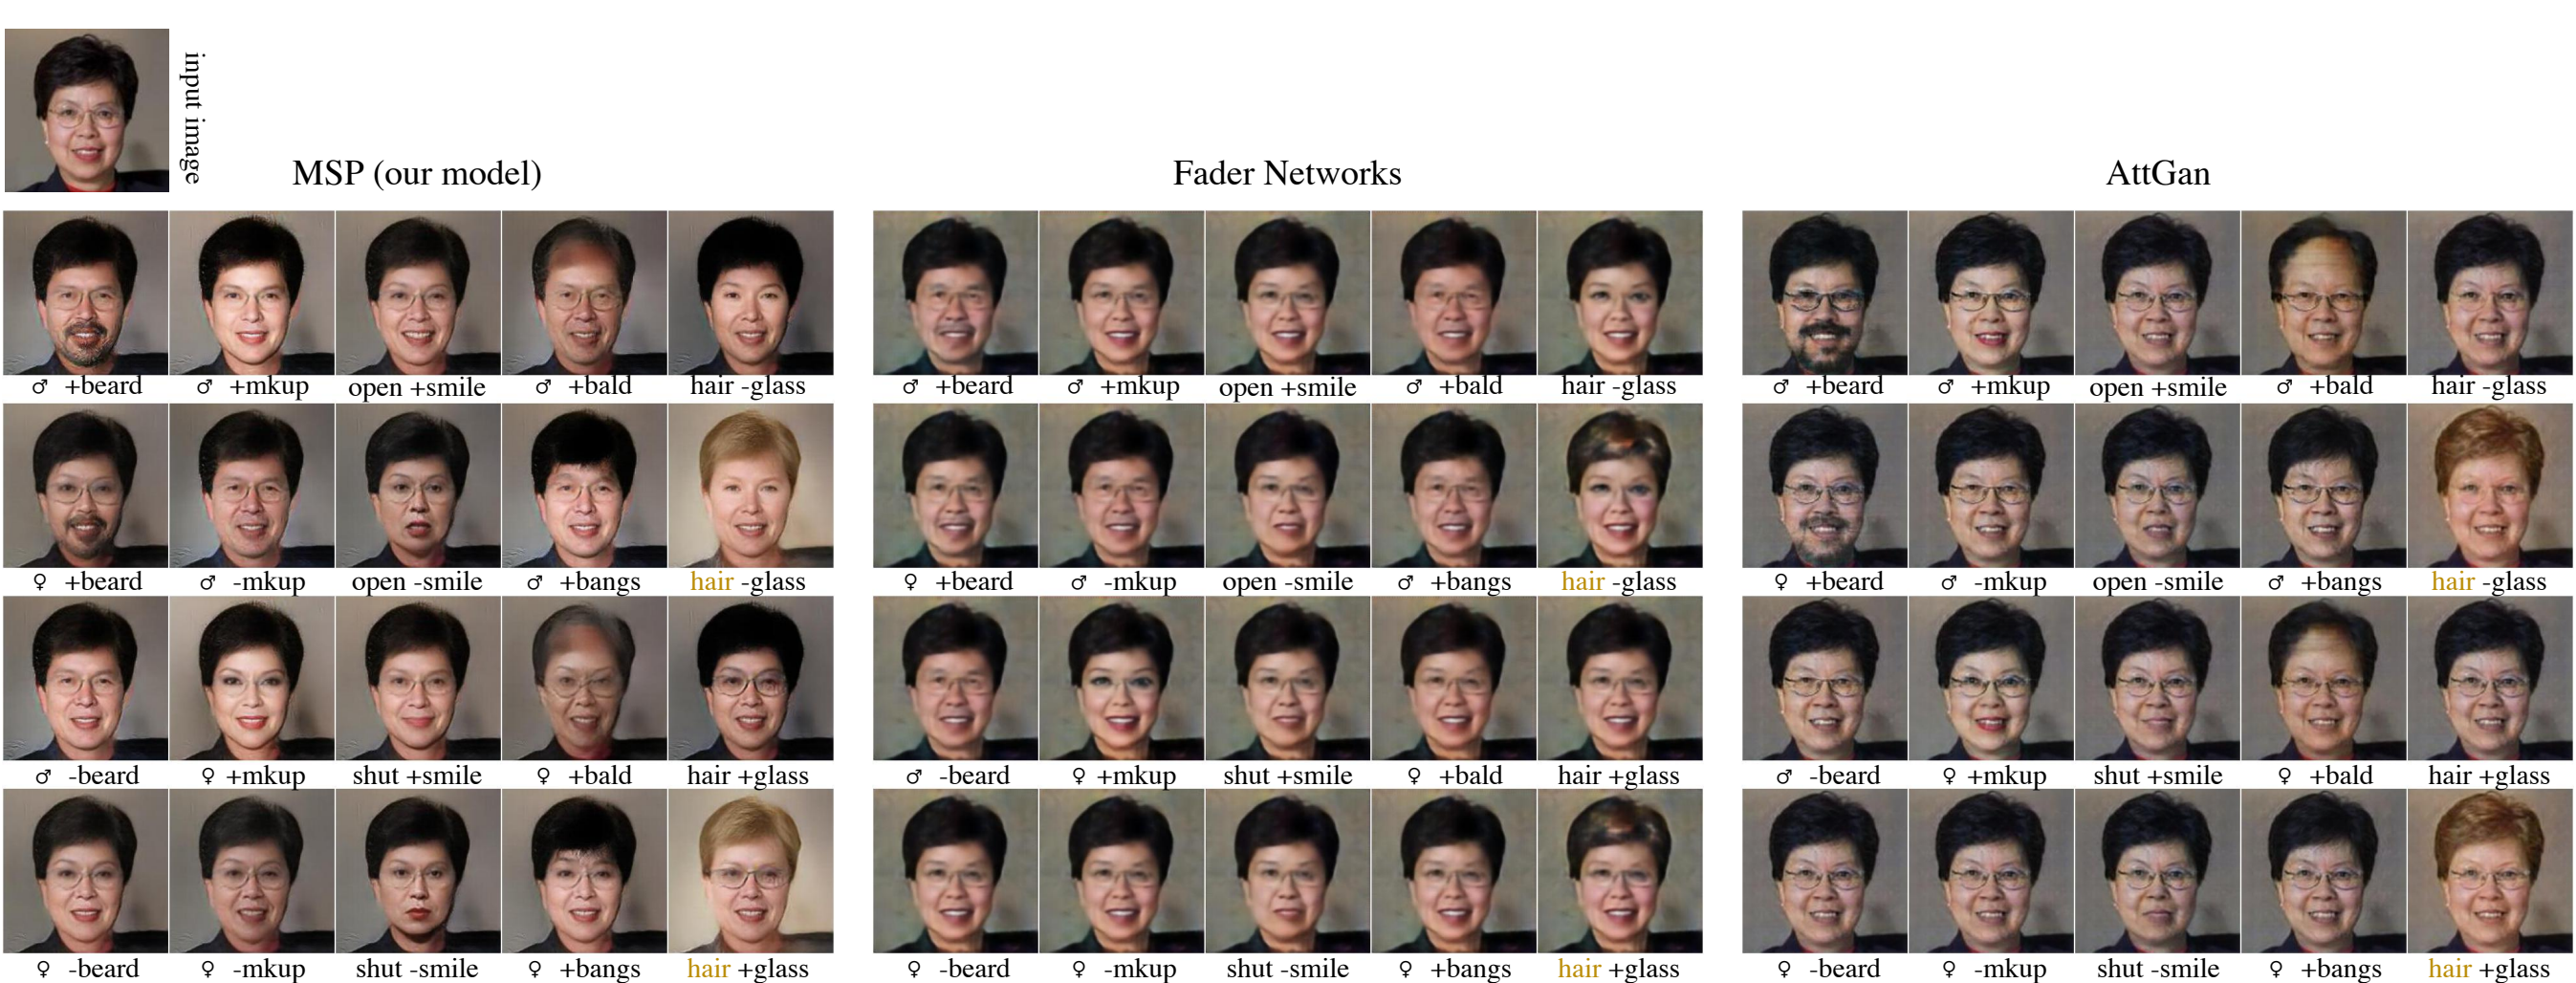











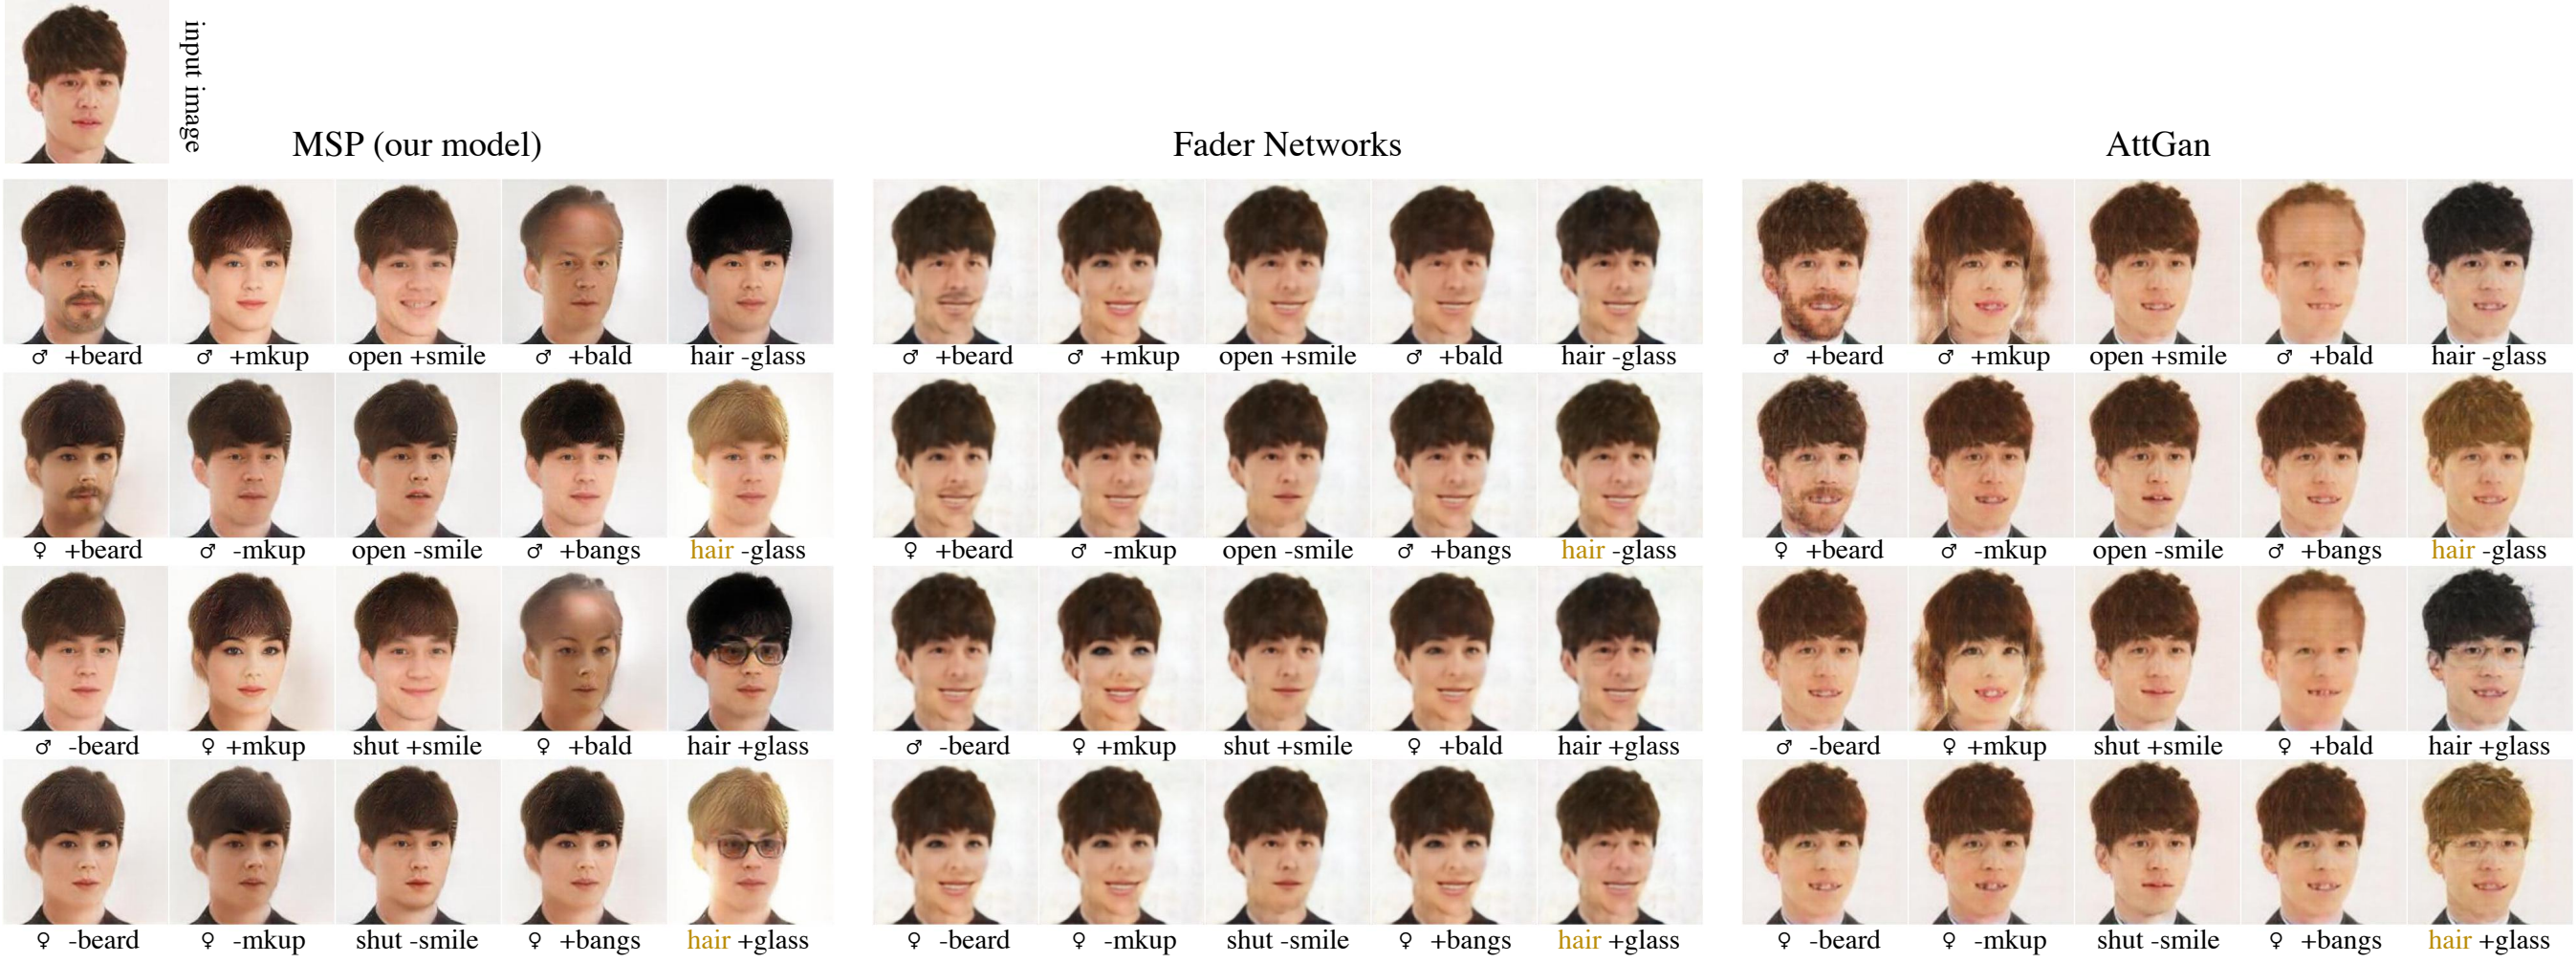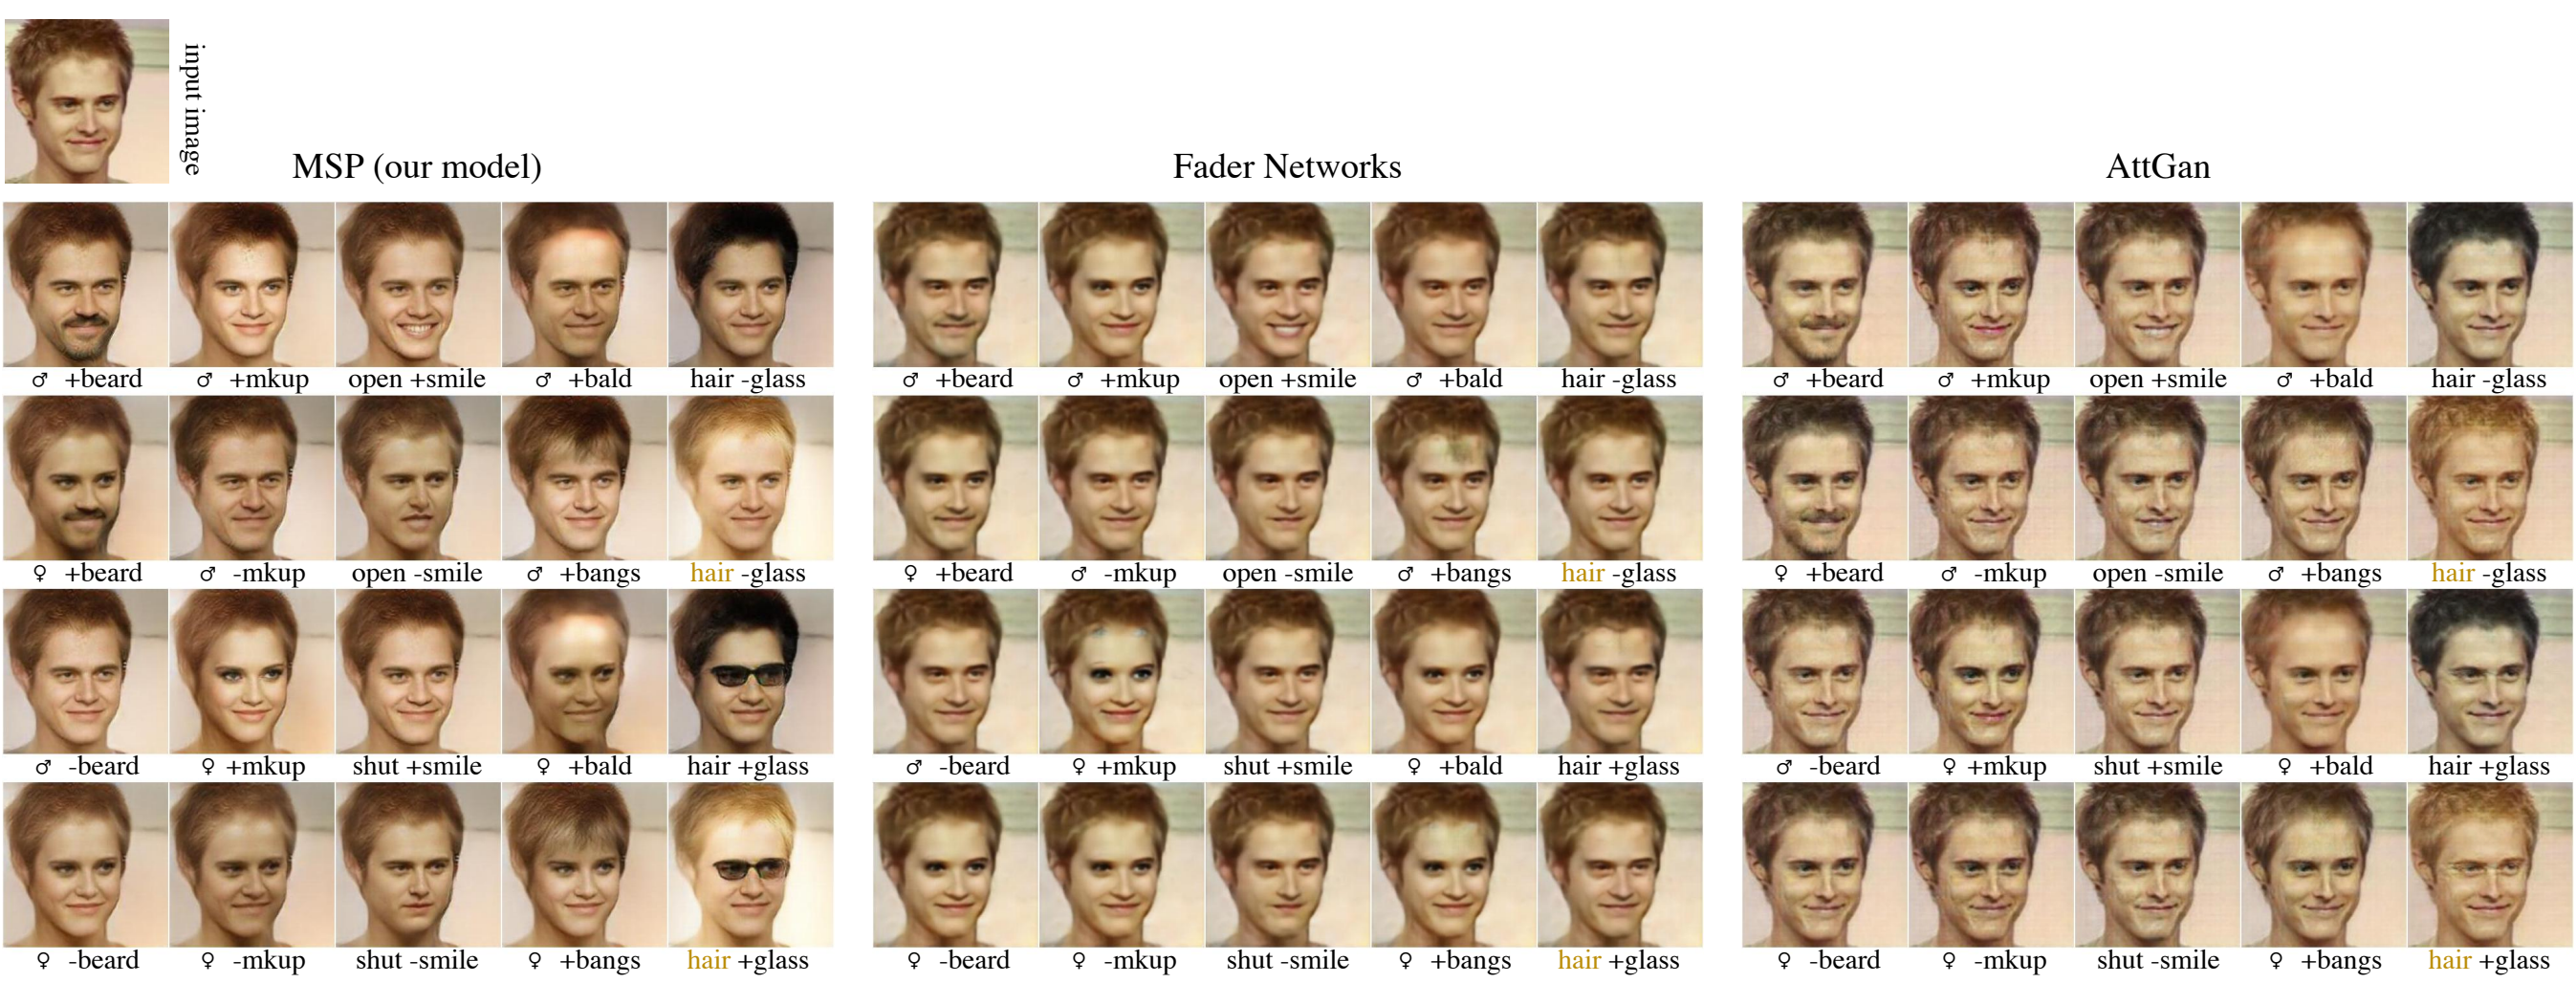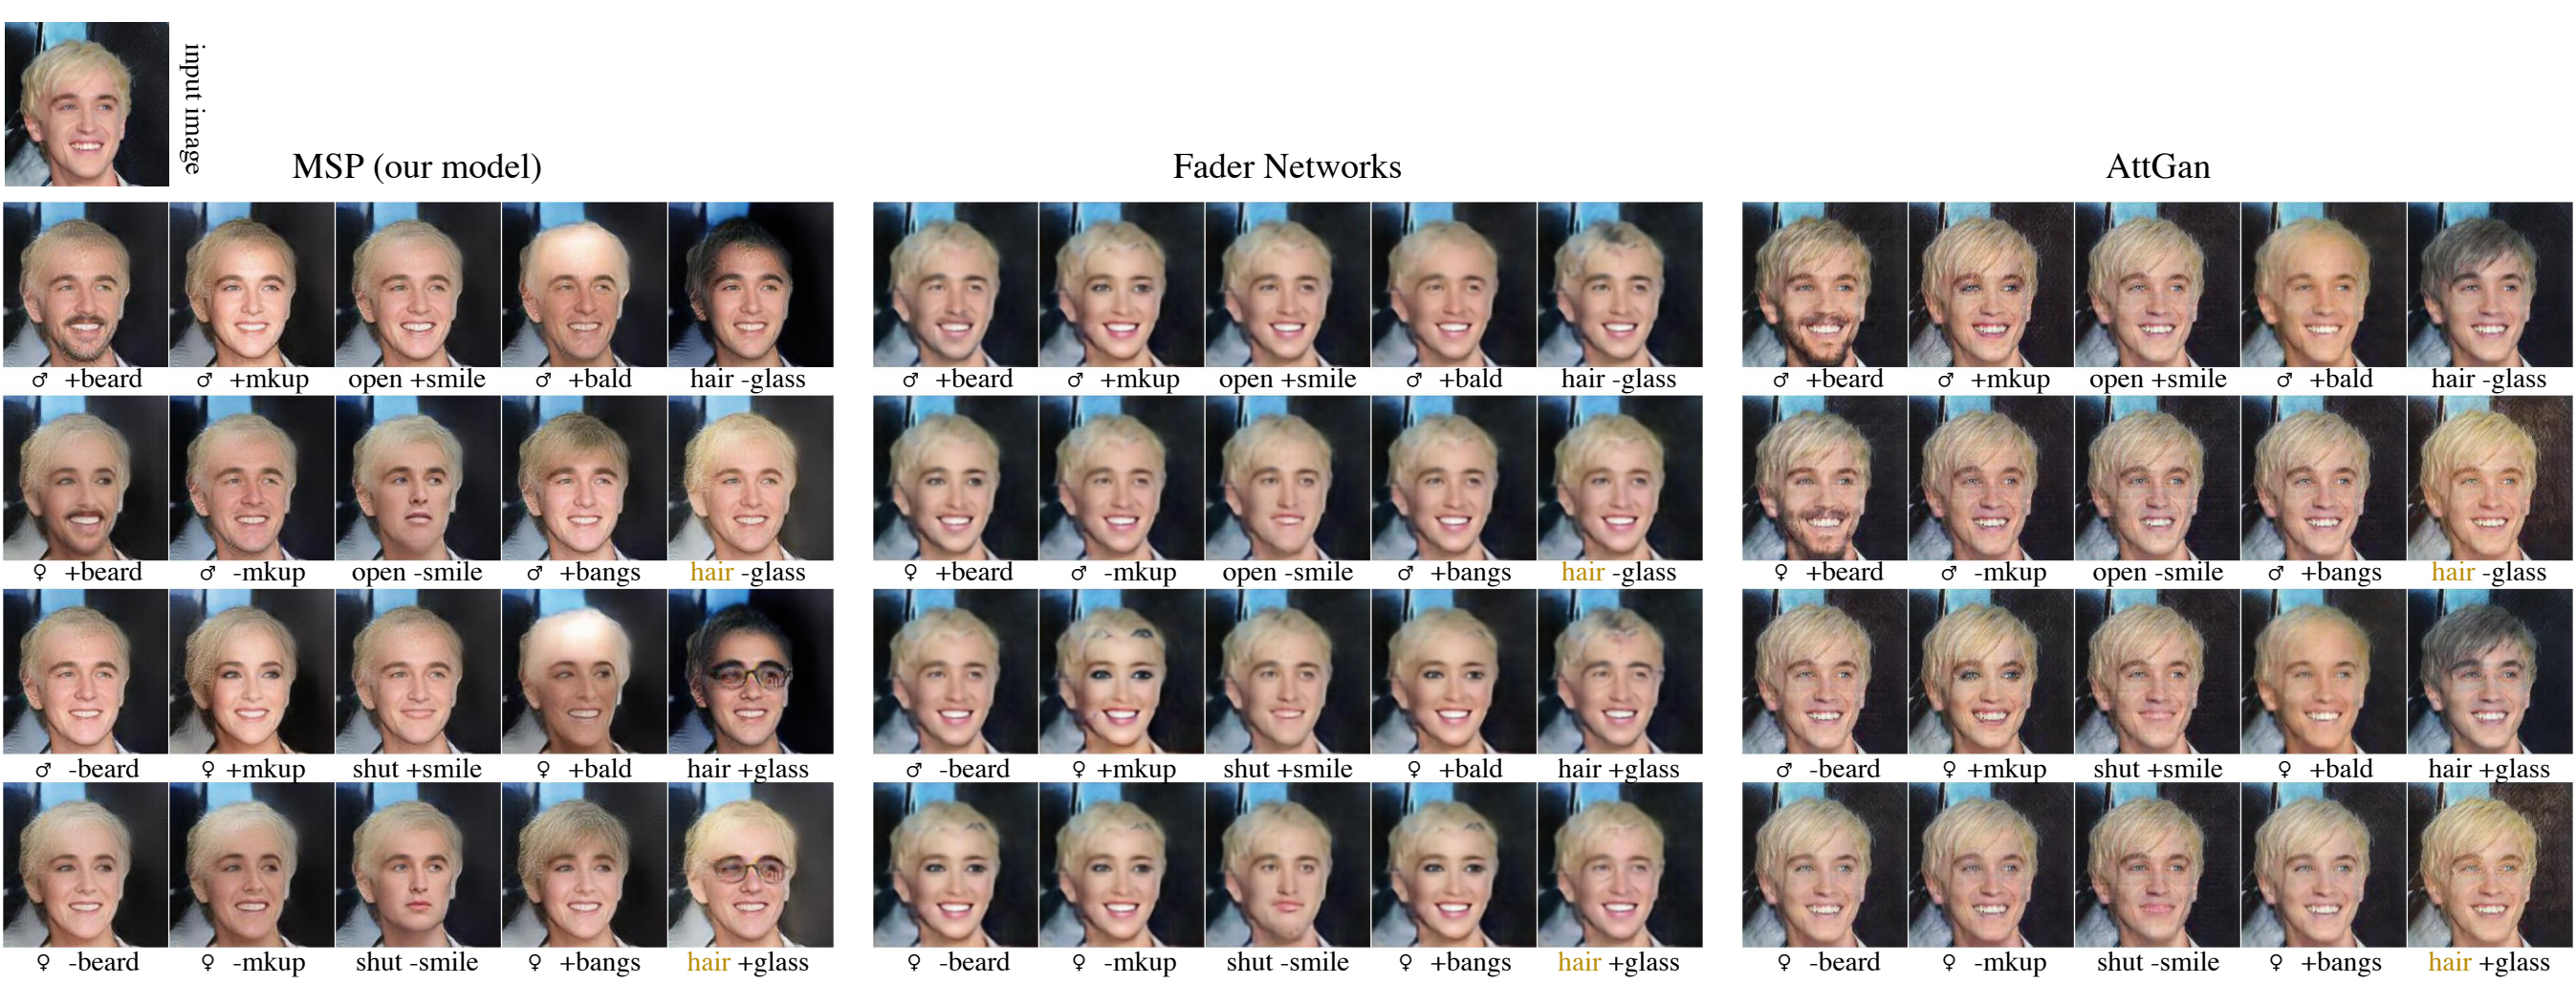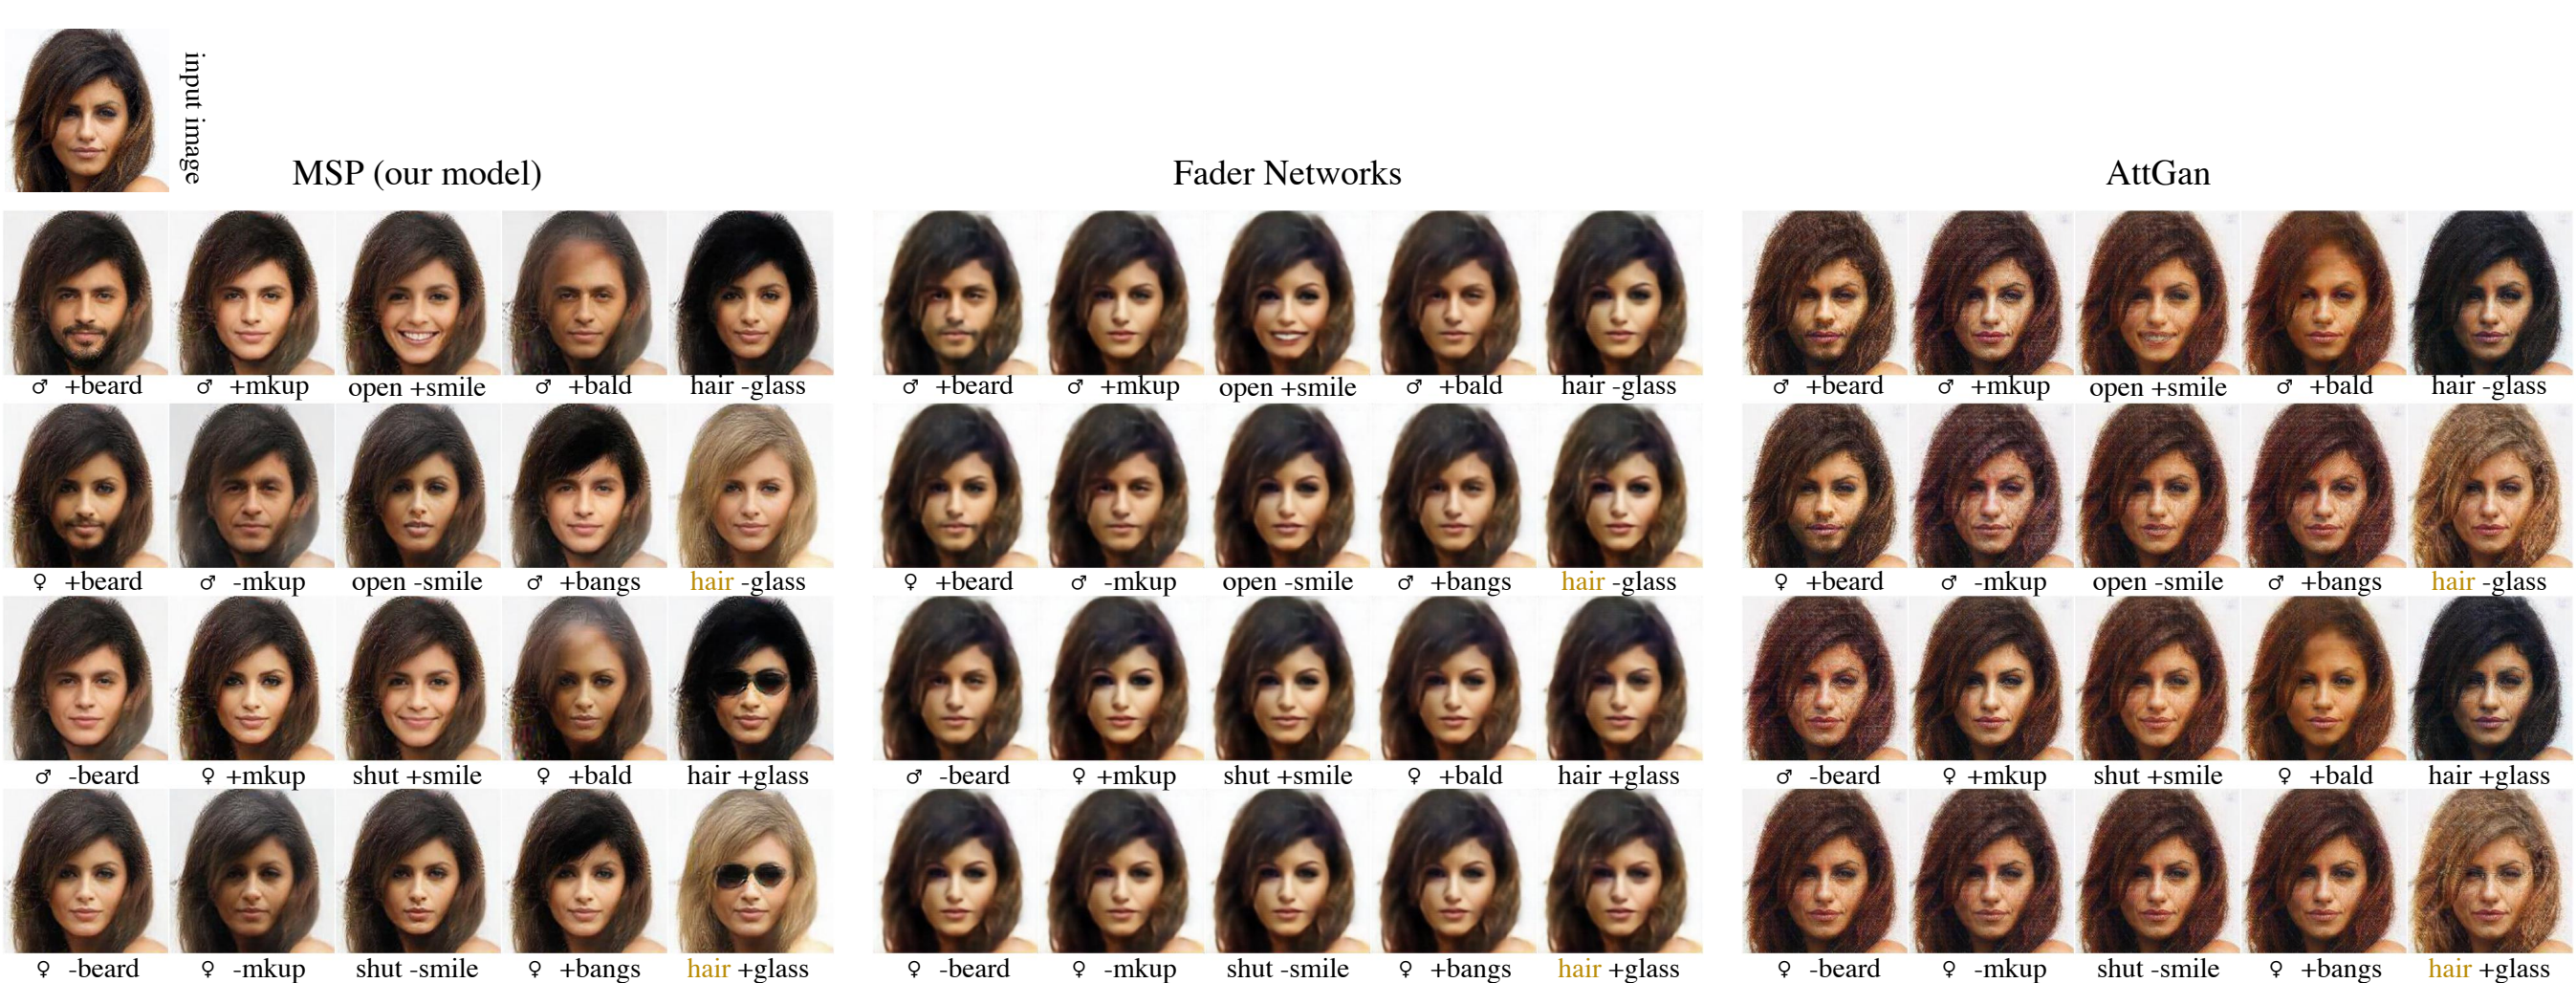







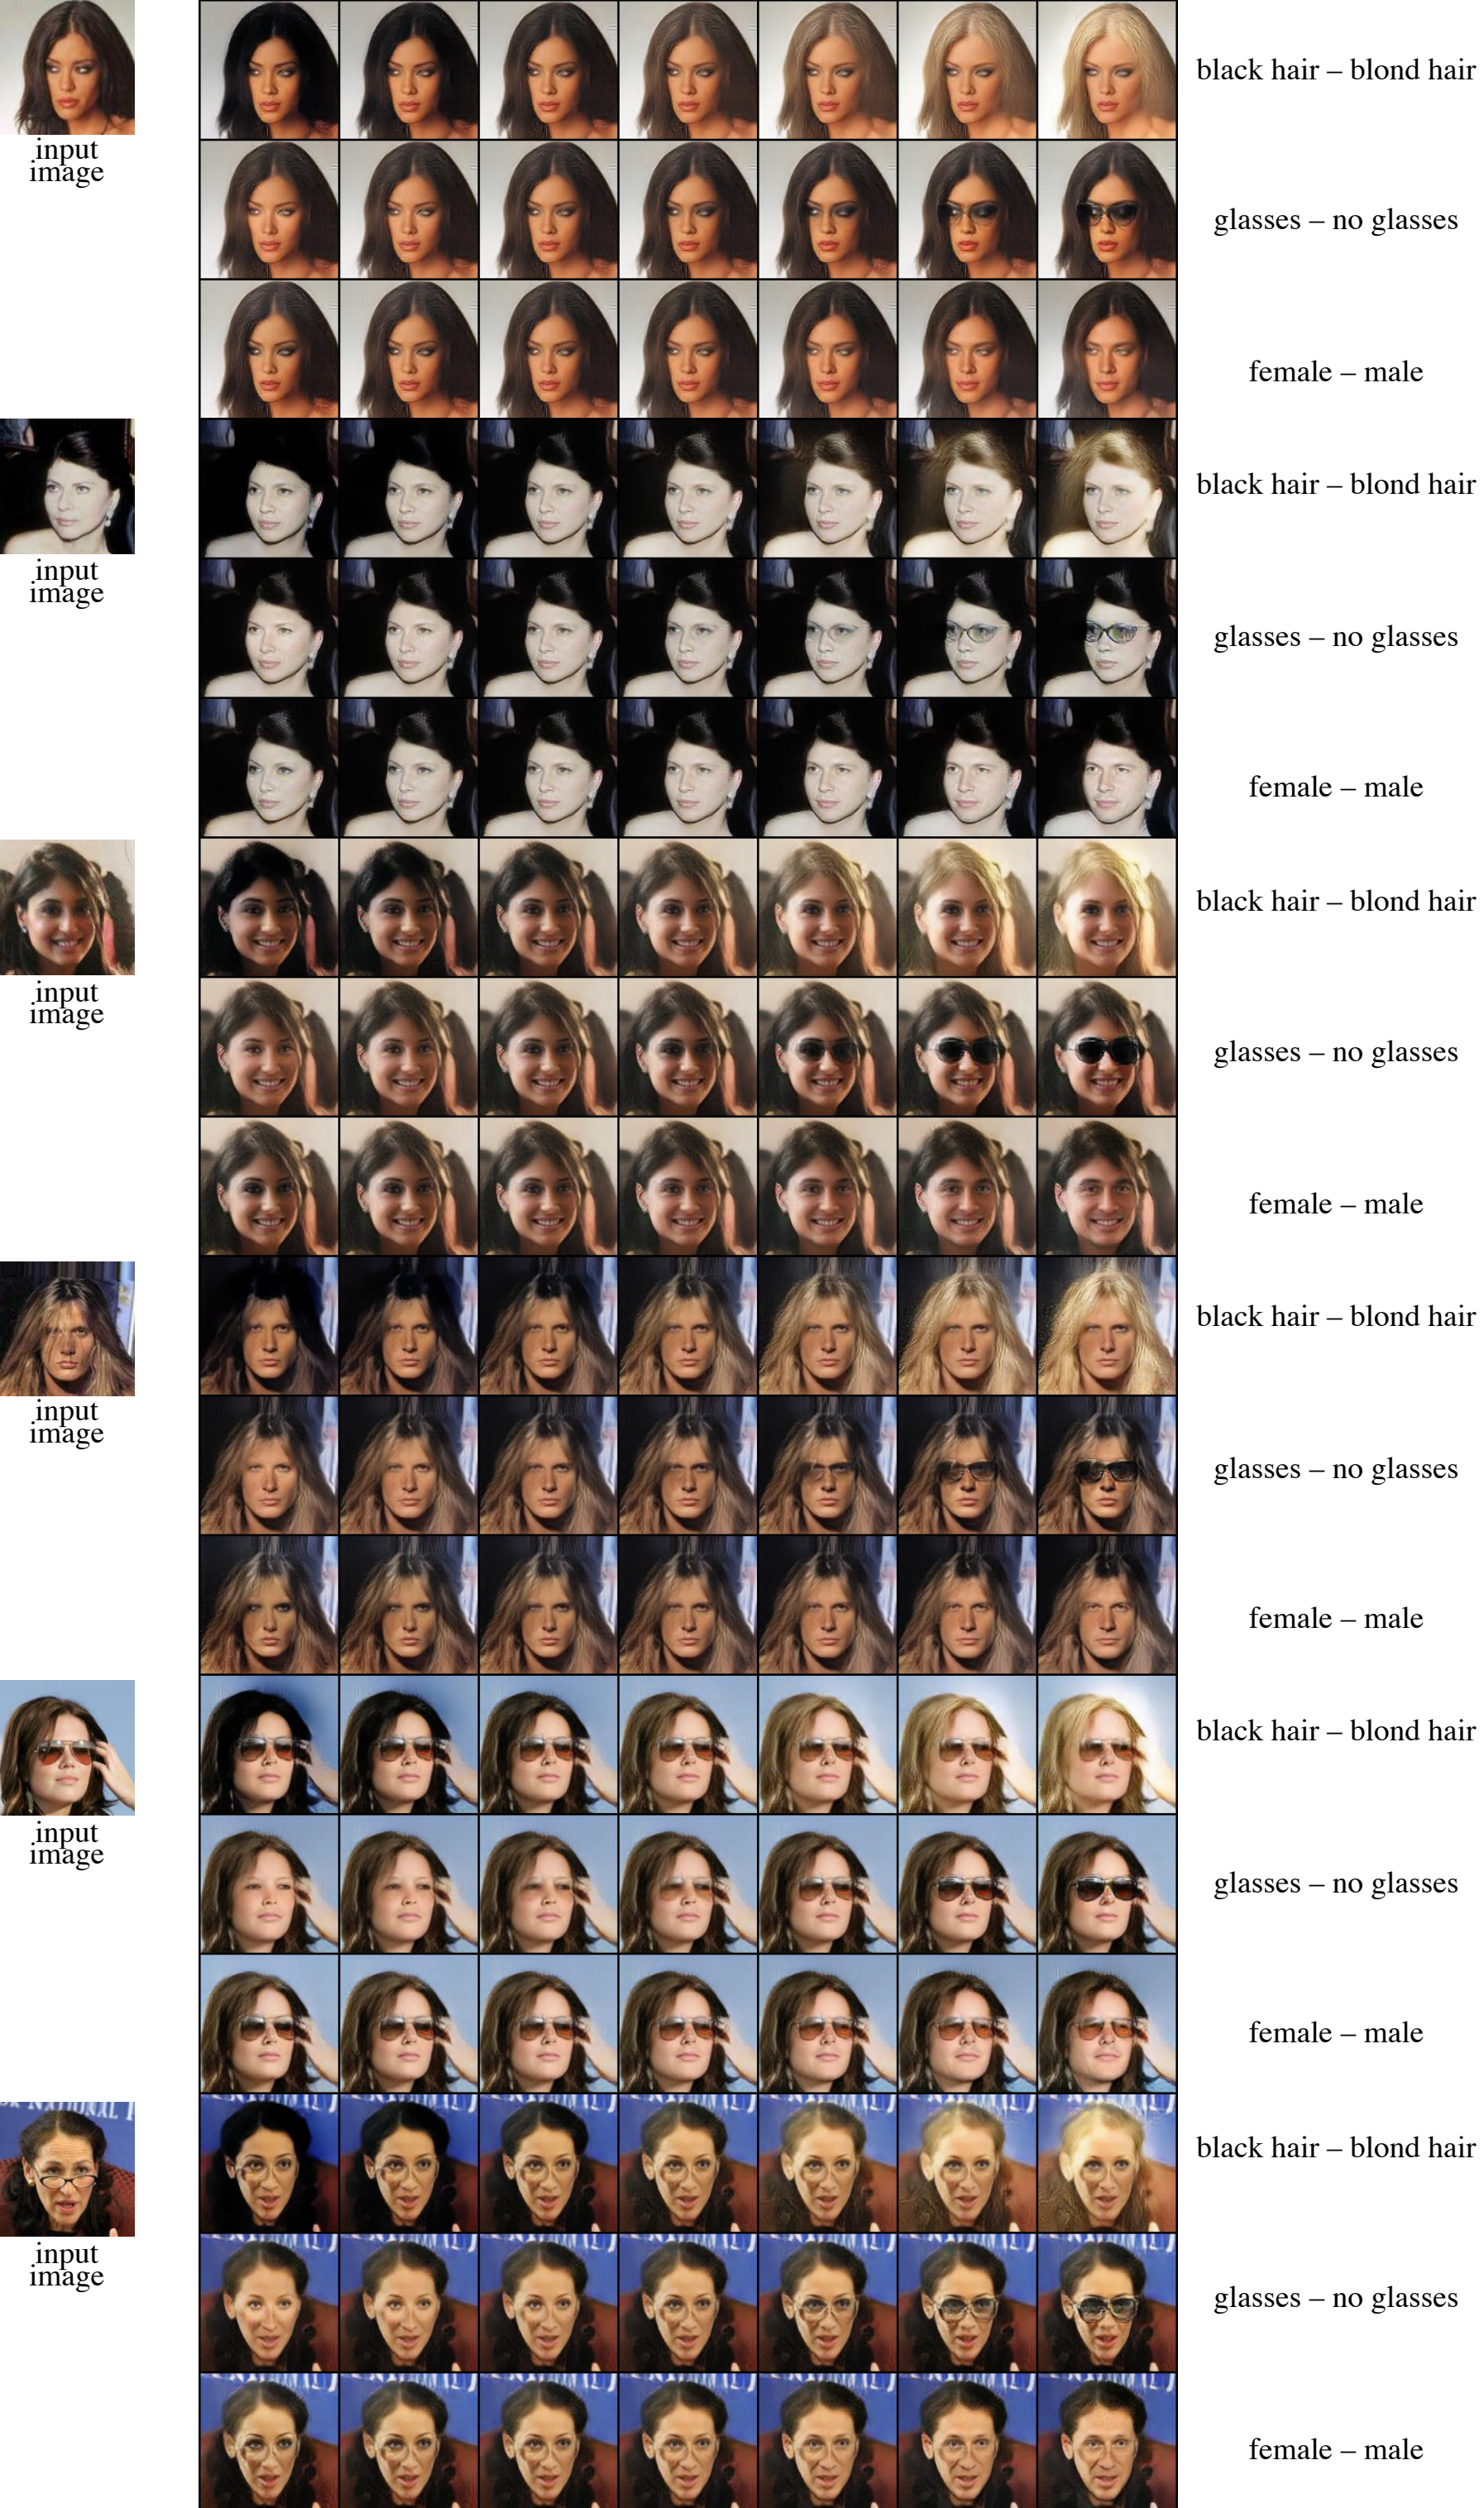

single-label morphing
